# Supplementary material for: Impact Analysis of processing strategies on Long-term GPS ZTD
Source: Copernicus journal article supplement (doi:10.5194/egusphere-2023-613), 2023-05-05
Supplement: Supplementary file [file egusphere-2023-613-AC1-supplement.pdf]

## Referee 1:

### General Comments

The work presented in the manuscript address the question about long term stability in estimated atmospheric propagation delays using ground-based GNSS stations.

The part I find most interesting, and that may be worth to be published, is the assessment of estimated trends and how these depend on the used mapping functions and the elevation cutoff angle. I think this part is an important contribution to the community but it needs to be more critical. In the present version of the manuscript, I think the results are overrated.

Response: Thank you very much for the recognition of our work and we appreciate all your valuable comments and suggestions. In the revised manuscript, we have addressed all concerns proposed by the reviewer and revised the description of importance of our results, especially in section “Abstract” and “Discussions and Conclusions”, which should make our results sound more objective.

We cannot speak about an optimum elevation cutoff angle in general because it is station dependent, i.e. the time dependence of systematic errors in e.g. mapping functions and the multipath environment. Therefore, the presented results are not necessarily in contradiction with those presented by Ning and Elgered (2012) and Baldysz et al. (2018). There is no conflict between these results because the stations analysed in this manuscript have almost no overlap with those in the other studies. Ideally, without systematic errors, the estimated trends shall be identical regardless of the elevation cutoff angle. This is different to the individual ZTD estimates where the geometry obtained for low elevation angles reduce the errors in the estimates (also for the estimated coordinates and especially the vertical). When trends are estimated individual errors are averaged out, if no systematic errors are present.

Response: We also used the same reference data (Raw radiosonde data) as the Ning et al. (2012) and came to a similar conclusion that GPS ZTD trends derived from higher elevation cut-off angle were better. However, if the homogenized RS data is used as a reference, the conclusion is different. Therefore, it can be shown that homogenization has a great impact on the estimated trend. In addition, we agree with you that if there is no systematic bias, the trends by using different elevation cut-off angles are certainly similar. However, in actual data processing, both our results and those

of Ning et al. (2012) and Dousa et al. (2017) show that different elevation cut-off angles may introduce different systematic biases, resulting in non-negligible differences in trends.

*Ning, T., and Elgered, G.: Trends in the atmospheric water vapour content from ground-based GPS: the impact of the elevation cutoff angle. IEEE J-STARS, 5(3), 744–751. <https://doi.org/10.1109/JSTARS.2012.2191392>, 2012.*

*Dousa, J., Vaclavovic, and P., Elias, M.: Tropospheric products of the second GOP European GNSS reprocessing (1996-2014). Atmos. Meas. Tech., 10, 3589–3607. <https://doi.org/10.5194/amt-10-3589-2017>, 2017.*

There ought to be a critical discussion about the uncertainties of the estimated trends as a base for a statement regarding which differences that are significant. For example, which differences seen between the estimated trends using the different elevation cutoff angles in Figure 8 are significant. Noting the consequences from introducing changepoints as described, I think this shall be analysed in more detail.

Response: We agree with the reviewer's comment that the significance of the differences and the uncertainties of the trends are closely related. Following your suggestion, we have added the relevant discussion of the trend uncertainties in the revised manuscript. Please see L191-192, L195-197, and L215-216 for the discussion of Figure 4 and Figure 6.

### **Specific comments**

Line (L)103: Radiosonde (RS) data were processed by Dai (2011) and are used as a reference. In the study data up to 2014 are used. This requires an explanation. How did you handle RS data acquired in the years thereafter?

Response: The homogenized radiosonde dataset from 1995 to 2012 was provided by Junhong Wang from University at Albany, SUNY. She homogenized the dataset by using method proposed in Dai (2011). We have added this in Acknowledgments, please see L281-282. In our work, for homogenized RS data, only data from 1995 to 2012 were used, and the data after 2012 were absent. We have emphasized this in the revised manuscript. Please see L105-106.

L126: I assume that when mapping functions are compared in Table 3, all these solutions are carried out using an elevation cutoff angle of 7°. Can you mention this explicitly? Please also comment on to what extent you find the differences in Table 3 significant.

Response: Following this suggestion, we have mentioned this explicitly in the captions of Table 3 and Table 4 (now Table 5 and 6 in the revised version). Results in Table 3 (now in Table 5) demonstrate that different mapping functions have small impacts on coordinate repeatability, with maximum difference of 0.02, 0.07 and 0.06 mm in the east, north and up component, respectively. We have no idea about how to estimate uncertainty of the coordinate repeatability, so it is hard to comment on the extent of significance of the differences in Table 3 (now in Table 5). But based on the values of the maximum difference, we can only say that this impact of mapping function is small.

L 140: As I have understood the RMS is defined as the root-sum-squared of the standard deviation and the bias. But this is not the case in Tables 5 and 6. Please explain.

Response: The RMS, STD and bias are average values of all stations. The equation ( $\text{RMS}^2 = \text{STD}^2 + \text{bias}^2$ ) is true for a single station, but not for averages of all stations.

L155: The ABS method suffers from the fact that if an unusual cold and dry month is followed by an unusual warm and humid month a false detection is likely. This ought to be discussed and the different criteria used to identify a changepoint shall be stated.

Response: We used the monthly ZTD time series to detect the changepoints, so the situation you mentioned will only affect one or two points on our monthly ZTD time series. The 'ABS' method used in our study mainly focuses on the shift between segments instead of one or two individual points that deviate the time series, which means this situation should not affect the detection of the 'ABS' method.

L167: I agree with your conclusion that the REL method shall not be used when the goal is to compare "before" and "after" with the ERA5 (because an improvement is expected when the reference data set is used to add changepoints in the GPS time series, the agreement between the trends is of course improved).

Response: Yes, that is the reason we focused on the ZTD time series homogenized by ‘ABS’ method rather than by ‘REL’ method.

The robustness of the trend results after adding changepoints can be assessed by studying subsets of the data and the stations.

Response: Following your suggestion, taking the VMF3 and 30° setting as an example, we estimated the GPS ZTD trends for both the full dataset (1995-2014) and subset (2000-2014) before and after homogenization as shown in the Figure below. Only those stations with changepoints detected after 2000 in the GPS ZTD time series are shown. The green and red bars represent trends for full dataset and subset, respectively, with their uncertainties denoted by black bars. It is obvious that the trends of the full dataset and subset agree better after homogenization than those before homogenization, which proves that trends after homogenization are more robust. We also analyzed the trends uncertainties where we can find that the uncertainties are larger for the subsets, illustrating that the data length can affect the uncertainties of the trends.

We are not sure whether we should include these discussions in the manuscript.

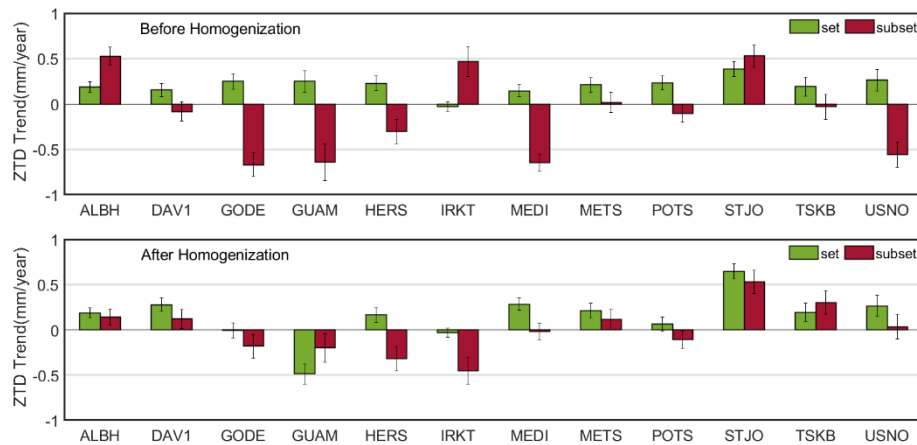

**Figure: GPS ZTD trends for both the full dataset (1995-2014, Green bars) and subset (2000-2014, Red bars) before (top) and after (bottom) homogenization and their uncertainties (Black error bars) when using VMF3 and 30° setting at stations with changepoints detected after 2000 in the GPS ZTD time series.**

**Some suggestions related to Table 7:**

(i) Apply changepoints only for the events that can be supported by the station log.

Response: In fact, we applied all changepoints in the station log when using PMTred method, but some changepoints were refused. This is due to the fact that not all of the changepoints in the station log can cause significant offsets, which was also found in Ning et al. (2016). In Table 1 of Ning et al. (2016), the changepoints they detected did not include all the changepoints documented in the site log files either.

*Ning T, Wickert J, Deng Z, Heise S, Dick G, Vey S, and Schöne T: Homogenized time series of the atmospheric water vapor content obtained from the GNSS reprocessed data. J Clim 29:2443–2456. <https://doi.org/10.1175/JCLI-D-15-0158.1>, 2016.*

(ii) Apply only those changepoints when Offset 1 and Offset 2 differ by less than a certain value. The fact that some of them are very different, as well as having opposite signs, I think is warning to be very careful.

Response: Following your comment, we have added this strategy in the revised manuscript. As we all know, the GPS ZTD time series contains some unknown signals, so the ZTD time series used for ‘ABS’ method only removed seasonal signals and the noise of time series used for ‘ABS’ is relatively large. It is therefore difficult to set the certain criteria for difference between Offset1 and Offset2. Instead, we only used the changepoints when Offset 1 and Offset 2 have the same sign, namely both positive or negative. We have emphasized this in the revised manuscript. Please see L169-170.

(iii) A combination of (i) and (ii).

Response: It is in fact a combination of (i) and (ii) in the revised manuscript, namely, applying the station log recorded changepoints first, and then following procedure in (ii) to detect additional changepoints. Please see L163-164 and L169-170. In the revised manuscript, all results after homogenization in section 4 are those applying the strategy (iii).

L182: Figure 5: The changepoints seen in the figure are not the ones in Table 7. Are not both of these carried out using an elevation cutoff angle of  $7^\circ$ ? Furthermore, the ones in Table 7 are not supported by station logs. I think that if you present such results as in Figure 5 you should discuss

them in more detail and arrive at some understanding why the two mapping functions result in such different trends. Can anyone of them be trusted?

Response: The Table 7 (now Table 10) only showed the changepoints detected in GPS ZTD time series estimated from VMF3 and  $7^\circ$ , not from all solutions using  $7^\circ$ .

Following your comments, we carefully checked our estimated results. We found the strange phenomenon was caused by our mistake. We forgot to exclude the ZTD estimates with the number of GNSS observations being zero. The data processing software will use the a-priori ZTD as output when observations are missing. For different mapping functions, different ZTD priori models were used. For example, GMF used the GPT model, and VMF1 used the ZTD prior values provided by VMF1. This leads to the obvious difference between ZTD from using GPT3 and VMF3 when the observations are missing, resulting in the difference in the detected changepoints.

In the revised manuscript, we have fixed this problem by excluding the ZTD outputs when observations are missing. Now different mapping functions have little influence on the accuracy of the results and the changepoints detection. Please see Table 7 and Figure 4.

Figure 8: Assuming that the work by Dai (2011) implied a significant improvement in the RS data, the results for the Raw comparison may be ignored. Adding that the introduction of changepoints seems to be a rather inaccurate method, the Dai and the ERA5 comparisons before homogenization are the most interesting. It is also worth noting that these two also give the best agreement for elevation cutoff angles of  $20^\circ$  and below. Using GPS satellites only (and not multi-GNSS) means that there are much less observations for cutoff angles above  $20^\circ$ .

Response: We have ignored the Raw comparison in Figure 4 and 6 of revised version, but still retained the Raw results in Figure 5 and 7 for comparison with conclusions from previous studies. For example, taking Raw data as a reference, we came to a similar conclusion to Ning et al. (2012). In the revised manuscript, we also found that Dai and ERA5 give the best agreement for elevation cut-off angles lower than  $20^\circ$ , which is consistent with the fact that the number of GPS satellites is less for cutoff angles above  $20^\circ$ . In addition, the ZTD trends estimated from different elevation cut-off angles are almost the same after homogenization, illustrating that the introduction of changepoints is effective. Please see section 4.4 for more details.

## Technical Corrections

Line(L) 6: "Homogenized atmospheric water vapor" sounds strange. To me it sounds like something done in a chemistry lab.?

Response : We have replaced “Homogenized atmospheric water vapor” with “Homogenized atmospheric water vapour data”. Please see L6.

L6+: You use the American spelling of vapour, although ACP is a European journal?

Response: We have replaced all ‘vapor’ into ‘vapour’ .

L11: the word "latest" may not be true if and when the manuscript is accepted for publication.

Response: We have deleted the word ‘latest’.

L14: 0.3 mm/yr --> 0.3 mm/year (and a few more places in the manuscript. Note that there is no symbol for "year" in SI, although some use "a", for annual)

Response: We have replaced all ‘mm/yr’ with ‘mm/year’.

L23: 7% --> 7 % (see also line 131)

Response: corrected. Please see L22 and L138.

L25: There are more recent IPCC reports. Although it does not change the statement it would be more relevant with a more recent one.

Response: Following your suggestion, we have replaced ‘IPCC (1996)’ with ‘IPCC (2023)’. Please see L24.

*IPCC, 2023: Climate Change 2021. Contribution of Working Group I to the Sixth Assessment Report of the Intergovernmental Panel on Climate Change. <https://www.ipcc.ch/report/ar6/wg1/>, 2023.*

L80: 300s --> 300 s

Response: corrected. Please see L79.

Table 1: Perhaps it will be more clear if you note that the E5 solution is used both in the mapping-function comparison and in the elevation cutoff-angle comparison?

Response: Yes, we have split Table 1 into Table 1 and Table 2 and have noted this in the revised manuscript. Please see L86-87.

Table 2: The unit for the random walk shall not be in italic font

Response: corrected. Please see Table 3.

L110: Equation (1) would be informative to explain a bit more so that an overall understanding can be obtained without reading the reference. For example, are the  $i$  and  $j$  terms all possible combinations (where  $t_j > t_i$ ) or adjacent values only? Please also define " $\hat{x}$ " in Equation (2).

Response: corrected. Please see L116 and L119-120.

Figure 2 (and Figure 5): Remove the text above the graphs and add it with an explanation in the figure captions?

Response: We have removed the text above the graphs in the Figure 2. The Figure 5 is removed.

Figure 4: Should not the green bars to the right in the graphs be blue (rather than green). The way I interpret the text is that there shall be one green and one blue bar for each mapping function?

Response: Yes, you are right. The text is that there shall be one green and one blue bar (now pink bar in the revised manuscript) for each mapping function. However, we showed the GPS ZTD trends before correction (Green bars) for all mapping function first, then ERA5 and Dai, and finally all corrected GPS ZTD trends (Blue bars).

L189: Y-axis label is missing

Response: We have removed Figure 5.

Figure 6: top and bottom shall read left and right.

Response: corrected. Please see Figure 5, L206 and Figure 7, L228.



L216 (and other places): homogeneization --> homogenization

Response: corrected. Please see L206 and L228.

L219: 30-yr --> 30 years

Response: corrected. Please see L231.

L285: A doi link is missing, also for some other references and the established standard acronyms for journals are not used in all cases. Furthermore, sometimes they are given as "https://..." addresses and sometimes just as "doi:..."

Response: corrected
